# Supplementary material for: Visible light responsive bismuth niobate photocatalyst: enhanced contaminant degradation and hydrogen generation
Source: Royal Society of Chemistry journal article supplement (doi:10.1039/c0jm01669a), 2010-01-01
Supplement: c0jm01669a.pdf [file c0jm01669a.pdf]

## Supporting Information

### Figure Captions

**Fig. S1** –XRD pattern of as-prepared SS-BNO.

**Fig. S2** - UV-Vis diffuse reflectance spectrum of as-prepared SS-BNO.

**Fig. S3** – The corresponding measuring region of EPMA.

**Fig. S4** - XRD patterns of precursors with different pH value in the suspensions.

**Fig. S5** - Kinetics of photocatalytic reactions for phenol degradation.

**Fig. S6** – UV-Vis spectra of phenol over NA-BNO at various irradiation times.

**Fig. S7** - Calculated band structure of  $\text{Bi}_3\text{NbO}_7$ .

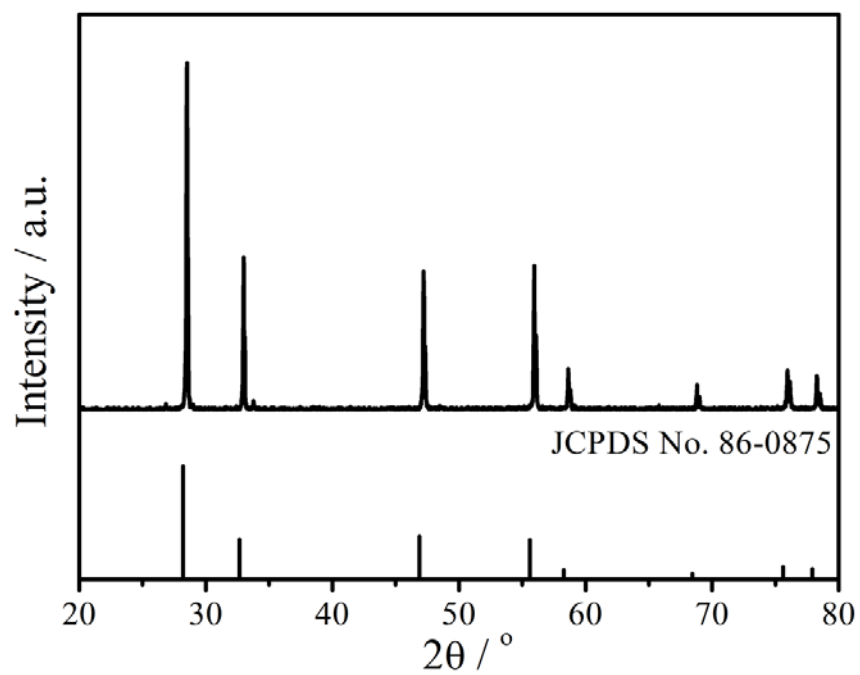

Fig. S1

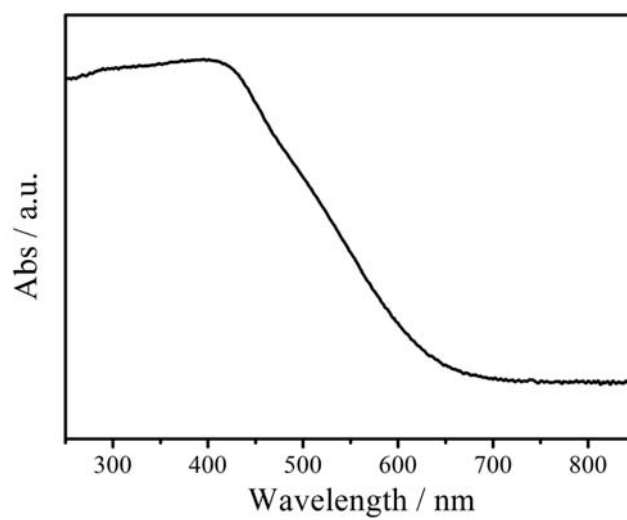

Fig. S2

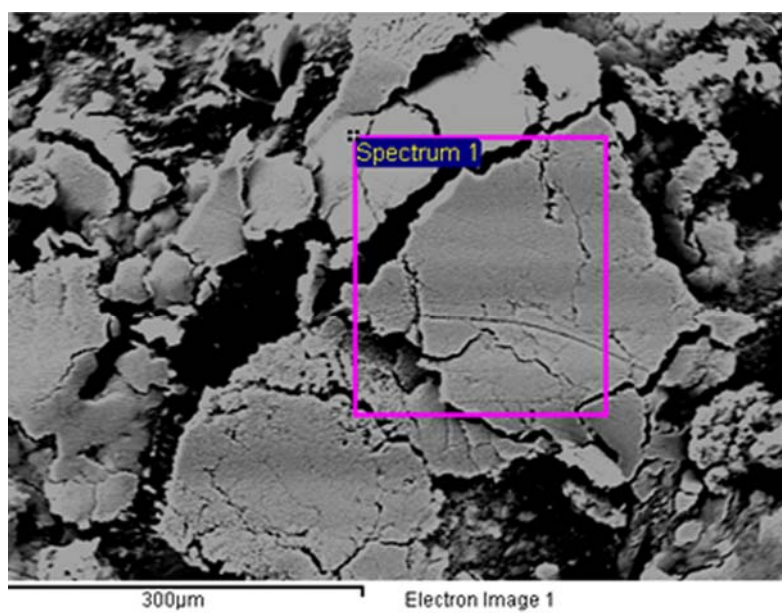

Fig. S3

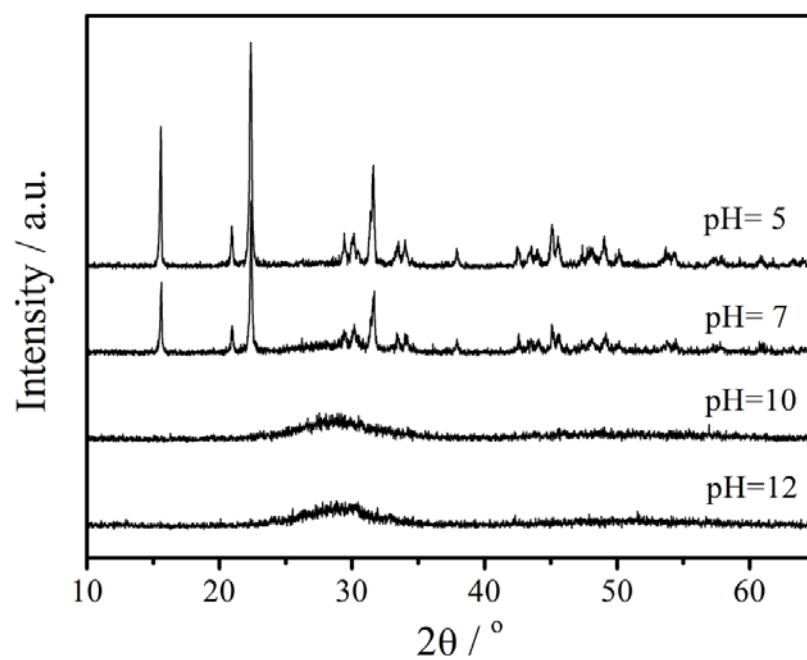

Fig. S4

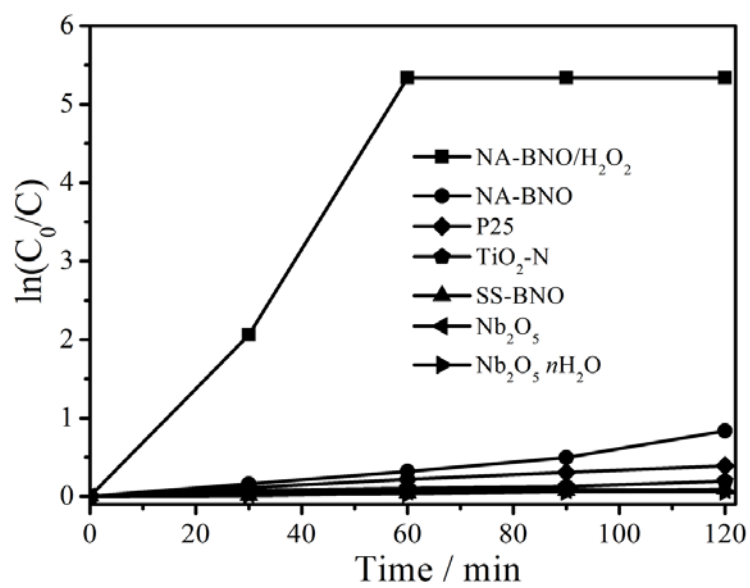

Fig. S5

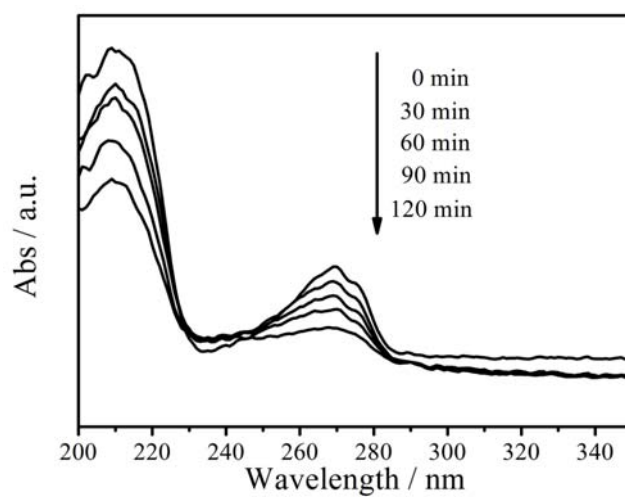

Fig. S6

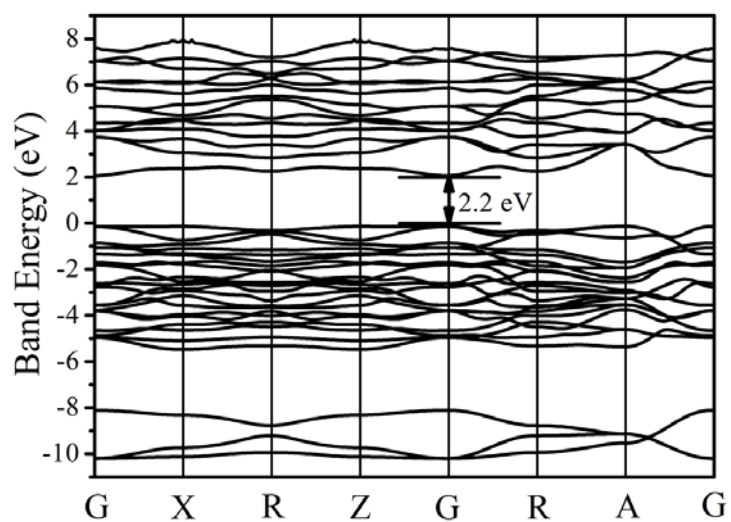

Fig. S7
